# Supplementary material for: Interbrain Synchrony Mitigates the Polarizing Effect of Echo Chambers
Source: Research Square preprint supplement (doi:10.21203/rs.3.rs-5499715/v1), 2025-03-19
Supplement: Supplementary file 1 [file f87aa505c91be3297095624a.pdf]

1                   **Interbrain Synchrony Mitigates the Polarizing Effect of Echo Chambers**

2

3                   **Supplementary Material**

4

5   **Supplementary Figure 1.**

6   *A moral dilemma and the moral appropriateness scale*

Enemy territory:

Baxter is the leader of a small group of soldiers. He and his soldiers are on their way back from a completed mission deep in enemy territory when Chris, one of Baxter's men has stepped in a trap that has been set by the enemy and is badly injured. The trap is connected to a radio device that by now has alerted the enemy to the soldier's presence. The enemy will soon be on their way. If the enemy finds the injured man, they will torture him and kill him. He begs Baxter not to leave him behind, but if Baxter tries to take him with him, the entire group will be captured. The only way to prevent this injured soldier from being tortured is for Baxter to shoot him himself.

Is it morally appropriate for Baxter to shoot this soldier in order to prevent him from being tortured by the enemy?

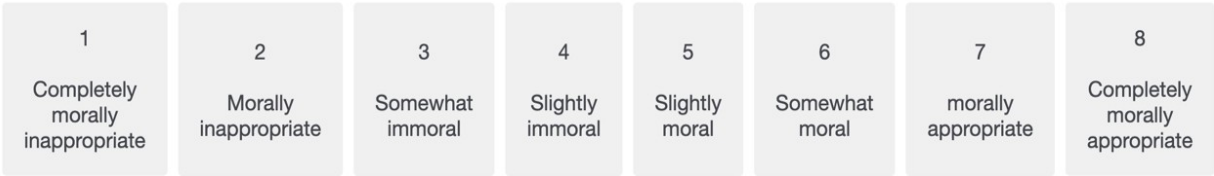

7

8                   *Note.* A screenshot of a computer screen in which one dilemma (out of ten) is presented

9 to the participants in our study. Underneath is the interactive moral appropriateness scale. Note

10 that the content in the screen is translated here to English, whereas the actual content in our

11 study was in either Hebrew or Arabic.

**Supplementary Table 1**

*Comparing Interbrain synchrony levels between real and pseudo groups across all ROI pairs and across both experimental conditions.*

| Condition  | ROI pair                    | $\beta_1$ | SE     | DF     | T value | P Value | bonferroni<br>corrected<br>sig. |
|------------|-----------------------------|-----------|--------|--------|---------|---------|---------------------------------|
| Discussion | Left dIPFC<br>(BA46)        | 0.0134    | 0.0032 | 877.31 | 4.3822  | < .001  | TRUE                            |
| Discussion | Right dIPFC<br>(BA46)       | 0.0106    | 0.0027 | 896    | 3.8308  | < .001  | TRUE                            |
| Discussion | Left dIPFC<br>(BA9)         | 0.0138    | 0.0029 | 887.09 | 4.7806  | < .001  | TRUE                            |
| Discussion | Right dIPFC<br>(BA9)        | 0.0125    | 0.0027 | 883.79 | 4.5388  | < .001  | TRUE                            |
| Discussion | Left pars<br>opercularis    | 0.0126    | 0.0028 | 897    | 4.3856  | < .001  | TRUE                            |
| Discussion | Right pars<br>opercularis   | 0.0114    | 0.0027 | 896    | 4.1522  | < .001  | TRUE                            |
| Discussion | Left pars<br>triangularis   | 0.0109    | 0.0027 | 887.56 | 4.0225  | < .001  | TRUE                            |
| Discussion | Right pars<br>triangularis  | 0.0163    | 0.0028 | 887.62 | 5.7698  | < .001  | TRUE                            |
| Discussion | Left<br>premotor<br>cortex  | 0.0104    | 0.0028 | 887.74 | 3.7337  | < .001  | TRUE                            |
| Discussion | Right<br>premotor<br>cortex | 0.0133    | 0.0029 | 886.41 | 4.6044  | < .001  | TRUE                            |

|          |                             |        |              |        |        |        |       |
|----------|-----------------------------|--------|--------------|--------|--------|--------|-------|
| Fixation | Left dIPFC<br>(BA46)        | 0.0062 | 0.0044       | 876.6  | 1.3973 | 0.1626 | FALSE |
| Fixation | Right dIPFC<br>(BA46)       | 0.0054 | 0.0040       | 885.53 | 1.3373 | 0.1814 | FALSE |
| Fixation | Left dIPFC<br>(BA9)         | 0.0085 | 0.0041       | 886.4  | 2.0659 | 0.0391 | FALSE |
| Fixation | Right dIPFC<br>(BA9)        | 0.0067 | 0.0039       | 885.29 | 1.6984 | 0.0897 | FALSE |
| Fixation | Left pars<br>opercularis    | 0.0071 | 0.0039       | 886.56 | 1.791  | 0.0736 | FALSE |
| Fixation | Right pars<br>opercularis   | 0.009  | 0.0042       | 885.5  | 2.1517 | 0.0316 | FALSE |
| Fixation | Left pars<br>triangularis   | 0.0107 | 0.0040       | 886.37 | 2.6735 | 0.0076 | FALSE |
| Fixation | Right pars<br>triangularis  | 0.0103 | 0.00419<br>2 | 886.42 | 2.4659 | 0.0138 | FALSE |
| Fixation | Left<br>premotor<br>cortex  | 0.01   | 0.0043       | 886.42 | 2.3165 | 0.0207 | FALSE |
| Fixation | Right<br>premotor<br>cortex | 0.0051 | 0.0042       | 885.25 | 1.2041 | 0.2288 | FALSE |

*Note.* This table summarizes the results of the twenty comparisons comparing interbrain synchrony value in real groups (dummy coded as 1) to pseudo groups (dummy coded as 0), across various ROI pairs and in both experimental conditions. That table includes the estimate of beta (synchrony in real groups minus synchrony in pseudo groups), standard error (SE), degrees of freedom (DF), t-value, p-value, and whether or not the p-value is significant compared to a Bonferroni corrected critical p.

## Supplementary Table 2

*Model comparisons between the ten separate H1 models and their corresponding null models.*

| ROI pair                    | Model      | N<br>paramters | AIC      | BIC      | Chi<br>square | DF | p value |
|-----------------------------|------------|----------------|----------|----------|---------------|----|---------|
| Left dlPFC<br>(BA46)        | Null Model | 5              | 904.785  | 925.162  |               |    |         |
|                             | H1 Model   | 7              | 895.597  | 924.125  | 13.187        | 2  | 0.0013  |
| Right dlPFC<br>(BA46)       | Null Model | 5              | 927.1426 | 947.6217 |               |    |         |
|                             | H1 Model   | 7              | 929.080  | 957.751  | 2.0619        | 2  | 0.3566  |
| Left dlPFC<br>(BA9)         | Null Model | 5              | 923.408  | 943.876  |               |    |         |
|                             | H1 Model   | 7              | 926.684  | 955.339  | 0.7242        | 2  | 0.6961  |
| Right dlPFC<br>(BA9)        | Null Model | 5              | 919.187  | 939.643  |               |    |         |
|                             | H1 Model   | 7              | 921.541  | 950.180  | 1.6461        | 2  | 0.439   |
| Left pars<br>opercularis    | Null Model | 5              | 928.323  | 948.814  |               |    |         |
|                             | H1 Model   | 7              | 932.202  | 960.889  | 0.121         | 2  | 0.9412  |
| Right pars<br>opercularis   | Null Model | 5              | 926.143  | 946.622  |               |    |         |
|                             | H1 Model   | 7              | 929.962  | 958.633  | 0.1808        | 2  | 0.9135  |
| Left pars<br>triangularis   | Null Model | 5              | 926.396  | 946.875  |               |    |         |
|                             | H1 Model   | 7              | 929.047  | 957.718  | 1.3491        | 2  | 0.5093  |
| Right pars<br>triangularis  | Null Model | 5              | 922.767  | 943.224  |               |    |         |
|                             | H1 Model   | 7              | 925.579  | 954.218  | 1.1883        | 2  | 0.552   |
| Left<br>premotor<br>cortex  | Null Model | 5              | 925.905  | 946.3729 |               |    |         |
|                             | H1 Model   | 7              | 925.882  | 954.537  | 4.0227        | 2  | 0.1338  |
| Right<br>premotor<br>cortex | Null Model | 5              | 916.065  | 936.499  |               |    |         |
|                             | H1 Model   | 7              | 917.485  | 946.092  | 2.5807        | 2  | 0.2751  |

*Note.* This table summarizes the results of the ten model comparisons.
